# Supplementary material for: Transcription and FACT facilitate the restoration of replication-coupled chromatin assembly defects
Source: PubMed Central journal article supplement (PMC10349138; doi:10.1038/s41598-023-38280-w), 2023-07-14
Supplement: 41598_2023_38280_MOESM1_ESM.pdf [file 41598_2023_38280_MOESM1_ESM.pdf]

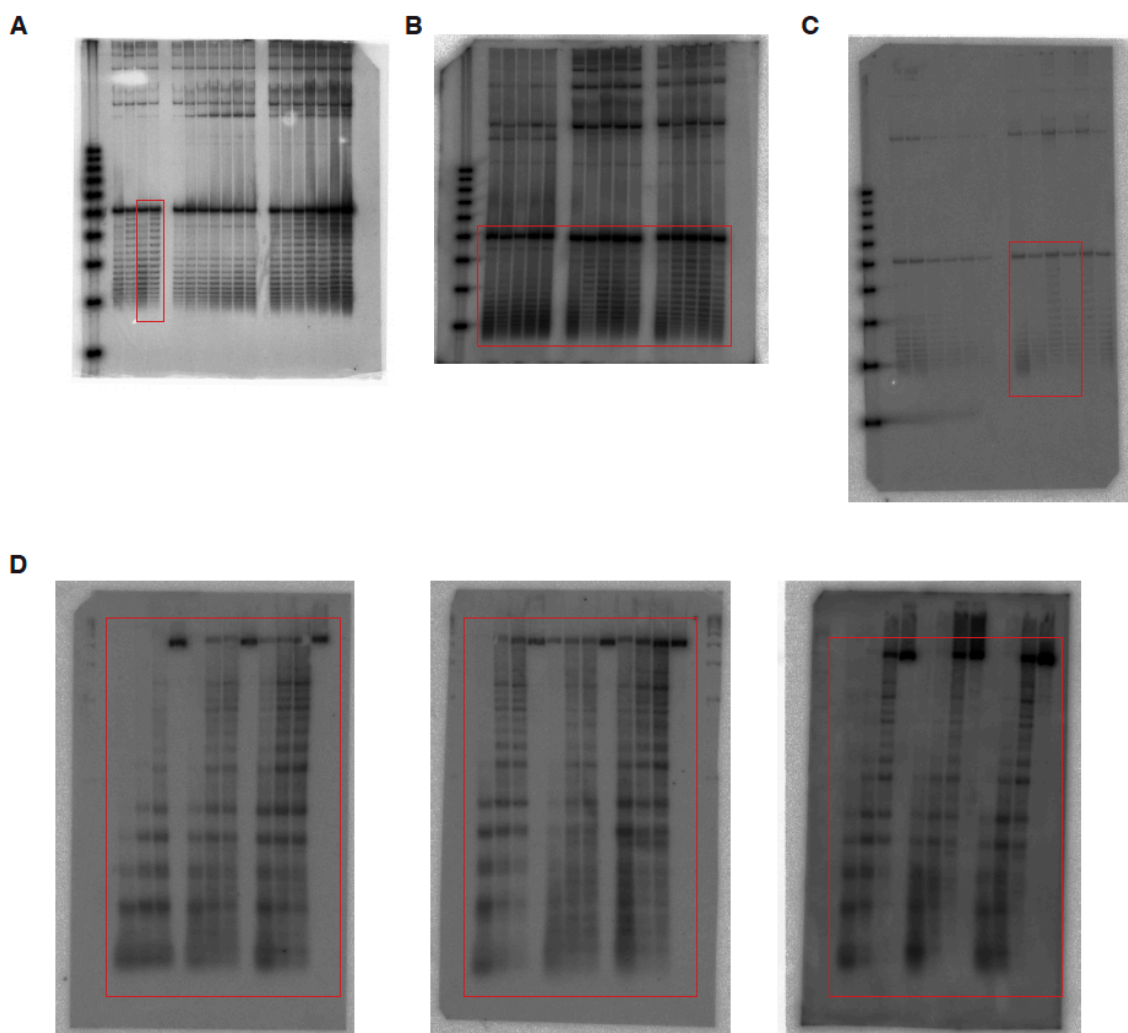

**Figure S1. Original gels for Figure 1**

Complete and cropped images for panels in Figures 1A-D.

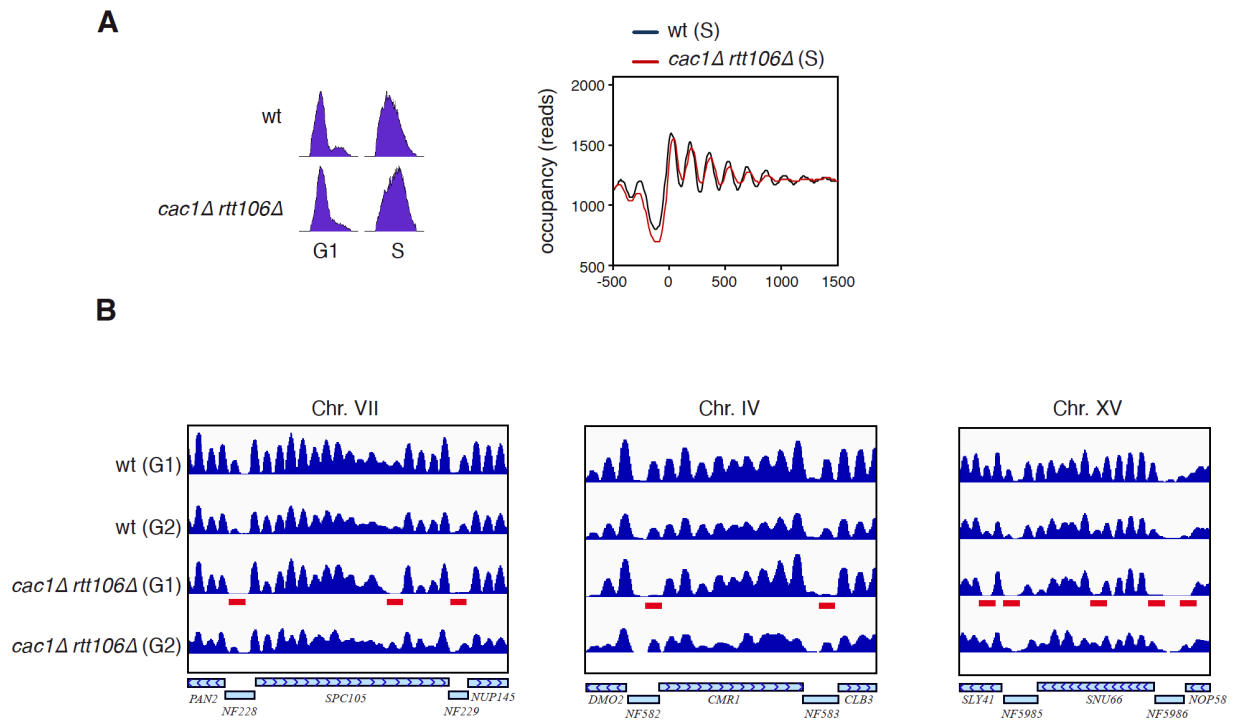

**Figure S2. Genome-wide analysis of chromatin in *cac1Δ rtt106Δ* and wild type cells**

**(A)** Genome-wide nucleosome profiles by MNase-seq for all yeast genes aligned relative to the TSS of wild type and *cac1Δ rtt106Δ* cells synchronized in G1 and released into fresh medium for 30 minutes until S phase. The FACS profiles are shown on the left. The analysis was performed with one biological replicate.

**(B)** Representative nucleosome profiles of wild type and *cac1Δ rtt106Δ* cells synchronized in G1 and released into fresh medium for 60 minutes until G2. Lost nucleosomes in *cac1Δ rtt106Δ* cells in G1 are underlined in red.

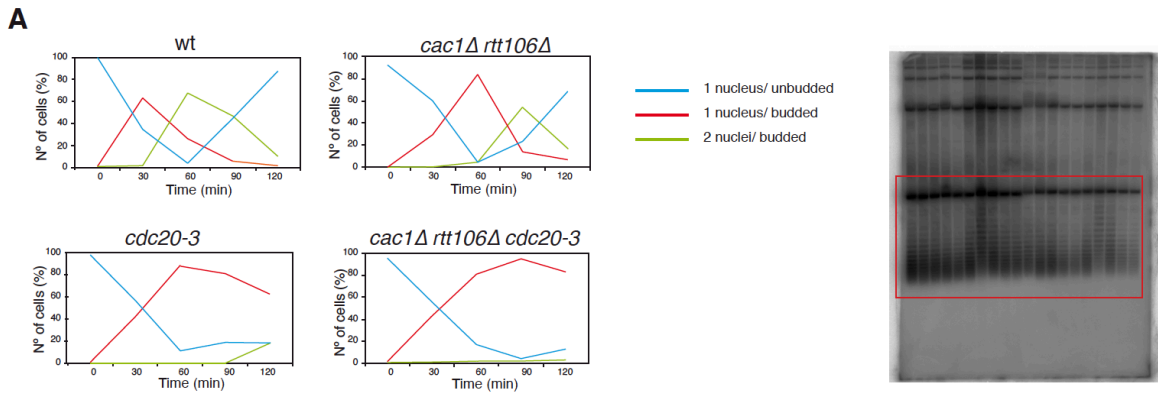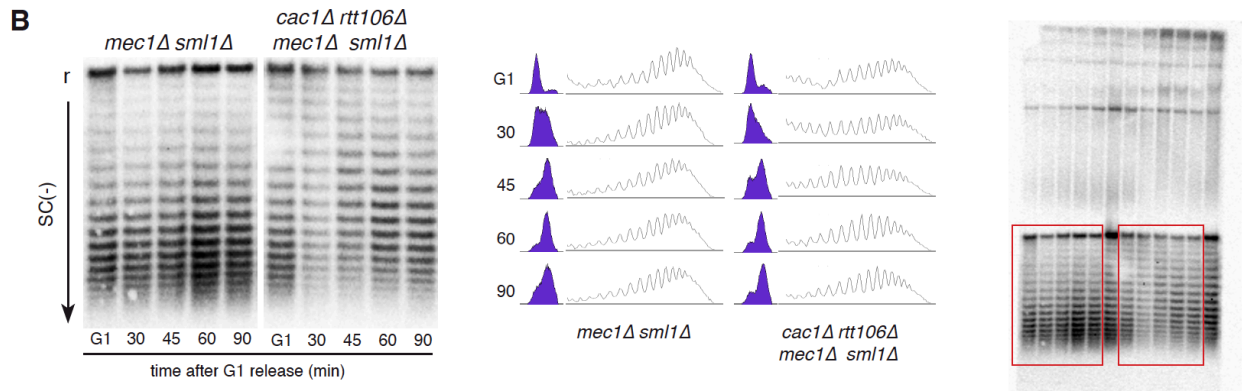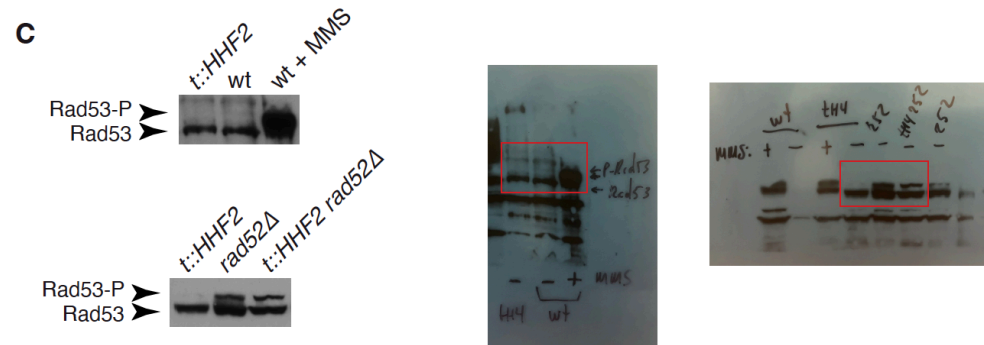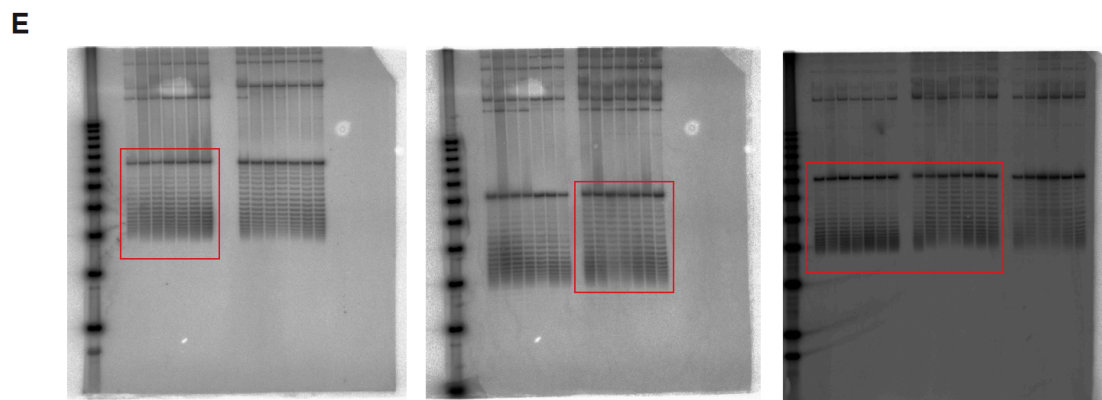

**Figure S3. Controls for the analysis of the role of metaphase arrest on chromatin restoration**

**(A)** Cell cycle progression of wild type, *cac1Δ rtt106Δ*, *cdc20-3*, and *cac1Δ rtt106Δ cdc20-3* cells under the conditions described in Figure 3A, as determined by cell morphology and DAPI staining of nuclei. The original gel for the topoisomer kinetics is shown on the right.

**(B)** Plasmid topoisomer distribution of the 2 $\mu$  plasmid in *mec1Δ sml1Δ* and *cac1Δ rtt106Δ mec1Δ sml1Δ* cells synchronized in G1 and released into fresh medium for different times. Cell cycle progression and topoisomer profiles are shown on the right.

**(C)** Partial depletion of histone H4 does not activate the DDC. DDC as determined by phosphorylation of Rad53 in asynchronous cultures of wild type and *t::HHF2* cells. Wild type cells treated with 0.033% MMS were included as positive control (top panel). The lack of SAC activation in *t::HHF2* cells is not due to active homologous recombination, as *rad52Δ* and *t::HHF2 rad52Δ* cells display similar levels of Rad53 phosphorylation (bottom panel). Original gels and selected areas are shown on the right.

**(D)** Original gels for Figure 3B. The selected areas for the corresponding panels are marked in red.

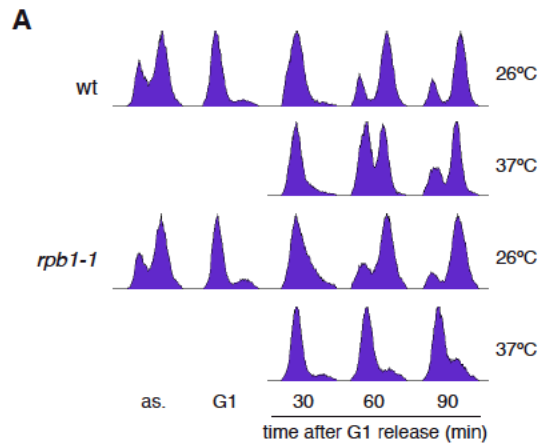

**B**

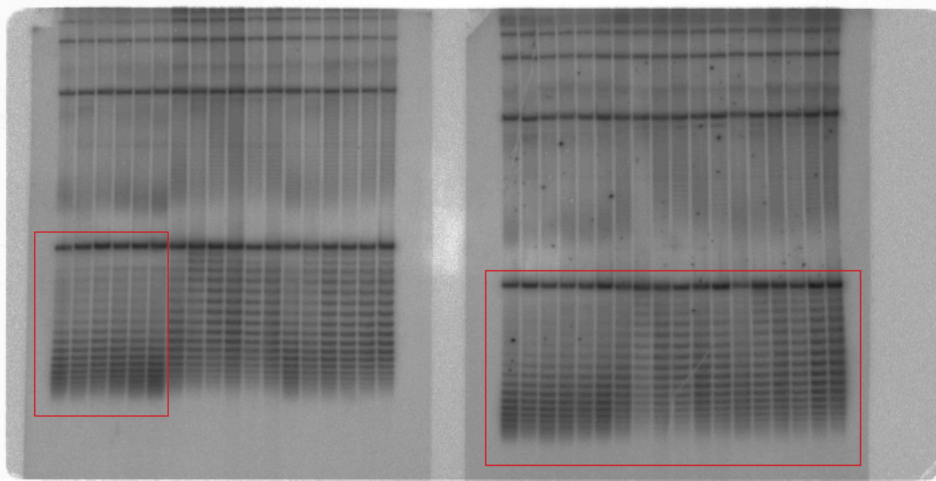

**Figure S4. The *rpb1-1* mutant is defective in G1 release at restrictive temperature**

(A) The *rpb1-1* mutant is defective in G1 release at restrictive temperature. Cell cycle progression of wild type and *rpb1-1* cells synchronized in G1 and released into fresh medium for different times at 26°C or 37°C.

(B) Original gels for Figure 4. The selected areas for the corresponding panels are marked in red.

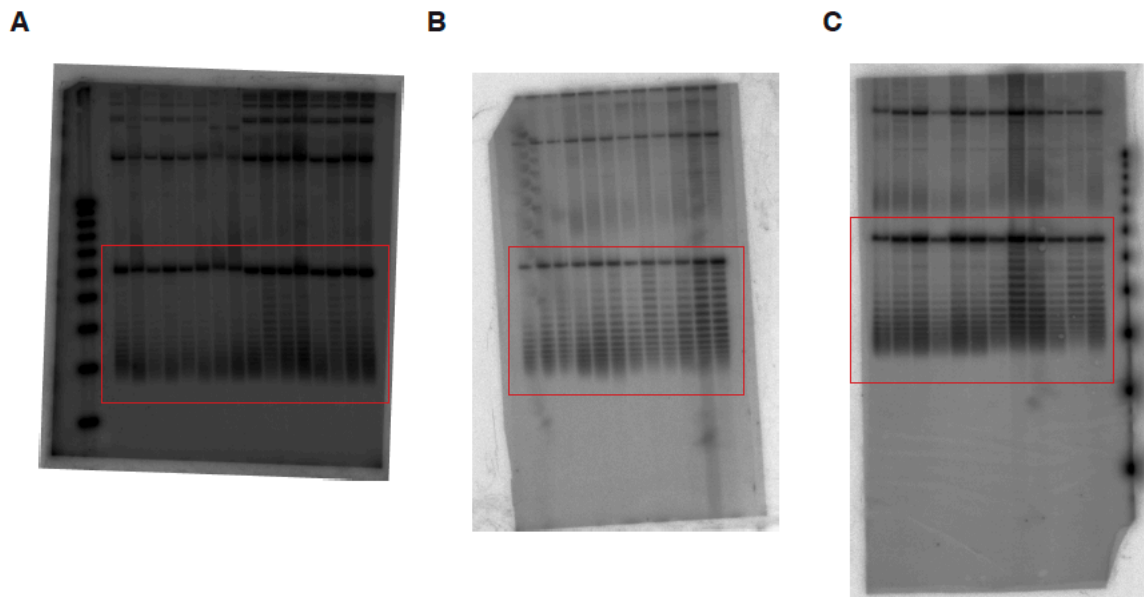

**Figure S5. Original gels for Figure 5**

The selected areas for the corresponding panels are marked in red.

**Table S1. *Saccharomyces cerevisiae* strains used in this study**

| <b>Strain</b>   | <b>Genotype</b>                                                                       | <b>Ref.</b>  | <b>Fig.</b>                                                         |
|-----------------|---------------------------------------------------------------------------------------|--------------|---------------------------------------------------------------------|
| w303b (YK-402)  | <i>MATa leu2-3,112 trp1-1 ura3-1 ade2-1 can1-100 his3-11 RAD5bar1Δ::HISG</i>          | <sup>1</sup> | 1A, 1B, 1D<br>S1A, S1B,<br>S1D, 2,<br>S2B, 3,<br>S3A, S3E,<br>5, S5 |
| wtH4-9b         | <i>bar1Δ::natMX4 hhf1Δ::hygMX4 hhf2Δ::kanMX4 (p413TARtetH4)</i>                       | <sup>2</sup> | 1A, S1A,<br>1D, S1D,<br>3B, S3E                                     |
| wtH4-8d         | <i>bar1Δ::natMX4 hhf1Δ::hygMX4 hhf2Δ::kanMX4 (p413TARtetH4)</i>                       | <sup>3</sup> | 1B, S1B                                                             |
| DMY10-10b       | <i>bar1Δ::natMX4 cac1Δ::kanMX4 rtt106Δ::hygMX4 hmlΔ::LEU2</i>                         | This work    | 1B, 1D,<br>S1B, S1D,<br>2, S2B, 3A,<br>S3A, 5, S5                   |
| DMY42-14a       | <i>bar1Δ::LEU2 cdc6:TRP1:GAL-CDC6</i>                                                 | This work    | 1C, S1C                                                             |
| DMY37-7c        | <i>bar1Δ::LEU2 hhf1Δ::hygMX4 hhf2Δ::kanMX4 (p413TARtetH4) cdc6:TRP1:GAL-CDC6</i>      | This work    | 1C, S1C                                                             |
| DMY87.1-3b      | <i>bar1Δ::natMX4 cdc20-3</i>                                                          | This work    | 3A, S3A                                                             |
| DMY90a-21d      | <i>bar1Δ::natMX4 cac1Δ::kanMX4 rtt106Δ::hygMX4 hmlΔ::LEU2 cdc20-3</i>                 | This work    | 3A, S3A                                                             |
| wm2-2           | <i>bar1Δ::hisG mad2Δ::LEU2</i>                                                        | <sup>2</sup> | 3B, S3E                                                             |
| wtH4bm2-1       | <i>bar1Δ::natMX4 hhf1Δ::hygMX4 hhf2Δ::kanMX4 (p413TARtetH4) mad2Δ::LEU2</i>           | <sup>2</sup> | 3B, S3E                                                             |
| wmec1s1-2c      | <i>bar1Δ::natMX4 mec1Δ::LEU2 sml1Δ::URA3 hmlΔ::LEU2</i>                               | This work    | S3B                                                                 |
| wc1r106m1s1-21d | <i>bar1Δ::natMX4 cac1Δ::kanMX4 rtt106Δ::hygMX4 mec1Δ::LEU2 sml1Δ::URA3 hmlΔ::LEU2</i> | This work    | S3B                                                                 |
| w303-11d        | <i>bar1::LEU2</i>                                                                     | This work    | S2A, 4, S4                                                          |
| wrpb1-1-3a      | <i>bar1::LEU2 rpb1-1</i>                                                              | This work    | 4, S4                                                               |

|               |                                                                                                         |              |                |
|---------------|---------------------------------------------------------------------------------------------------------|--------------|----------------|
| wc1r106-7c    | <i>bar1Δ::natMX4 cac1Δ::kanMX4<br/>rtt106Δ::hygMX4 hmlΔ::LEU2</i>                                       | This work    | S2A, 4,<br>S4B |
| wc1r106r1-1_3 | <i>cac1Δ::kanMX4 rtt106Δ::hygMX4 hmlΔ::LEU2<br/>bar1Δ::natMX4 rpb1-1</i>                                | This work    | 4, S4B         |
| DMY84.1       | <i>bar1Δ::HISG hir1Δ::HIS3</i>                                                                          | This work    | 5A, S5A        |
| DMY86.1       | <i>bar1Δ::natMX4 cac1Δ::kanMX4<br/>rtt106Δ::hygMX4 hmlΔ::LEU2 hir1Δ::HIS3</i>                           | This work    | 5A, S5A        |
| DMY161-5c     | <i>bar1Δ::natMX4 spt16G132D</i>                                                                         | This work    | 5B, S5B        |
| DMY165-3a     | <i>bar1Δ::natMX4 cac1Δ::kanMX4<br/>rtt106Δ::hygMX4 hmlΔ::LEU2 spt16G132D</i>                            | This work    | 5B, S5B        |
| DMY155-39c    | <i>bar1Δ::natMX4 hmlΔ::LEU2 spt16-m::natR</i>                                                           | This work    | 5C, S5C        |
| DMY151-32a    | <i>bar1Δ::natMX4 cac1Δ::kanMX4<br/>rtt106Δ::hygMX4 hmlΔ::LEU2 spt16-m::natR</i>                         | This work    | 5C, S5C        |
| BY4741        | <i>Mat a his3Δ1 leu2Δ0 ura3Δ0 met15Δ0 LYS2</i>                                                          | Euroscarf    | S3C            |
| BYtetH4-10D   | <i>Mat α MET15 LYS2 hhf1Δ::kanMX4<br/>hhf2Δ::kanMX4 (p413TARtetH4)</i>                                  | <sup>4</sup> | S3C            |
| Y10540        | <i>Mat α MET15 lys2Δ0 rad52Δ::kanMX4</i>                                                                | Euroscarf    | S3C            |
| BY52tetH4-2D  | <i>Mat α MET15 LYS2 hhf1Δ::kanMX4<br/>hhf2Δ::kanMX4 (p413TARtetH4)<br/>rad52Δ::kanMX4 trp1Δ::kanMX4</i> | <sup>4</sup> | S3C            |

All strains are isogenic to W303-1A (*MATa leu2-3,112 trp1-1 ura3-1 ade2-1 can1-100 his3-11 RAD5*), except BY and Y1 strains that are isogenic to BY4741 (*Mat a his3Δ1 leu2Δ0 ura3Δ0 met15Δ0 LYS2*). Only the relevant genotypes are shown.



## References

1. Ogi, H., Wang, C.-Z., Nakai, W., Kawasaki, Y. & Masumoto, H. The role of the *Saccharomyces cerevisiae* Cdc7–Dbf4 complex in the replication checkpoint. *Gene* 414, 32–40 (2008).
2. Murillo-Pineda, M., Cabello-Lobato, M. J., Clemente-Ruiz, M., Monje-Casas, F. & Prado, F. Defective histone supply causes condensin-dependent chromatin alterations, SAC activation and chromosome decatenation impairment. *Nucleic Acids Res* 42, 12469–12482 (2014).
3. Maya-Miles, D. *et al.* Crosstalk between chromatin structure, cohesin activity and transcription. *Epigenet Chromatin* 12, 47 (2019).
4. Prado, F. & Aguilera, A. Partial Depletion of Histone H4 Increases Homologous Recombination-Mediated Genetic Instability. *Mol Cell Biol* 25, 1526–1536 (2005).
